# Supplementary material for: The inhibitory effect of KIAA1456 on the proliferation and metastasis of epithelial ovarian cancer through SSX1 and AKT signaling pathway
Source: Research Square preprint supplement (doi:10.21203/rs.3.rs-950951/v3), 2022-05-31
Supplement: Supplementary file 1 [file 131734f614813d8d404a45b7.docx]

**Table 2** Microarray analysis identified a list of genes significantly differentially expressed after KIAA1456 overexpression.

| **Gene Symbol** | **Accession Number** | **Gene Description** | **Fold Change** | **p-value** | **Gene Feature** |
| --- | --- | --- | --- | --- | --- |
| IQGAP1 | NM_003870 | "Homo sapiens IQ motif containing GTPase activating protein 1 (IQGAP1), mRNA." | 1.702313 | 0.000584 | up |
| UBE4A | NM_001204077 | "Homo sapiens ubiquitination factor E4A (UBE4A), transcript variant 2, mRNA." | 1.419223 | 0.00054 | up |
| PSMD1 | NM_001191037 | "Homo sapiens proteasome (prosome, macropain) 26S subunit, non-ATPase, 1 (PSMD1), transcript variant 2, mRNA." | 1.365103 | 0.000545 | up |
| KIAA1456 | NM_001099677 | "Homo sapiens KIAA1456 (KIAA1456), transcript variant 2, mRNA." | 1.314254 | 0.000115 | up |
| SMARCA1 | NM_003069 | "Homo sapiens SWI/SNF related, matrix associated, actin dependent regulator of chromatin, subfamily a, member 1 (SMARCA1), transcript variant 1, mRNA." | 1.286039 | 0.000653 | up |
| TRIM29 | NM_012101 | "Homo sapiens tripartite motif containing 29 (TRIM29), mRNA." | 1.222872 | 0.000775 | up |
| SSX1 | NM_005635 | "Homo sapiens synovial sarcoma, X breakpoint 1 (SSX1), mRNA." | 5.73389 | 5.10E-05 | down |
| CYP1A1 | NM_000499 | "Homo sapiens cytochrome P450, family 1, subfamily A, polypeptide 1 (CYP1A1), mRNA." | -2.26197 | 0.013938 | down |
| IGHD2-21 | ENST00000390572 | cdna:known chromosome:GRCh37:14:106354409:106354436:-1 gene:ENSG00000211912 gene_biotype:IG_D_gene transcript_biotype:IG_D_gene | -1.5694 | 0.026841 | down |
| IER3 | NM_003897 | "Homo sapiens immediate early response 3 (IER3), mRNA." | -1.50082 | 0.020279 | down |
| HMOX1 | NM_002133 | "Homo sapiens heme oxygenase (decycling) 1 (HMOX1), mRNA." | -1.47563 | 0.003978 | down |
